# Supplementary material for: Dehydroxylation of kaolinite to metakaolin—a molecular dynamics study
Source: Royal Society of Chemistry journal article supplement (doi:10.1039/c0jm01748e), 2010-12-09
Supplement: c0jm01748e.pdf [file c0jm01748e.pdf]

## Supplementary Information

Table1: Calculated and Experimental Structural properties from the Teter Potential Model Tests – references indicate source of the atomic positions for each structure. All structures optimised using the General Utility Lattice Program (GULP)<sup>1</sup>.

| Structure                 | a (Å)  |                                            |        | b (Å)    |                                  |        | c (Å)    |                                   |        |
|---------------------------|--------|--------------------------------------------|--------|----------|----------------------------------|--------|----------|-----------------------------------|--------|
|                           | Exp    | Calc                                       | % diff | Exp      | Calc                             | % diff | Exp      | Calc                              | % diff |
| Kyanite <sup>2</sup>      | 7.1170 | 7.1521                                     | 0.49   | 7.8600   | 7.8888                           | 0.37   | 5.5750   | 5.5788                            | 0.07   |
| Andalusite <sup>3</sup>   | 7.7930 | 7.8462                                     | 0.68   | 7.8973   | 7.9541                           | 0.72   | 5.5558   | 5.5615                            | 0.10   |
| Sillimanite <sup>2</sup>  | 7.3717 | 7.4695                                     | 1.33   | 7.5243   | 7.5443                           | 0.27   | 5.7242   | 5.8587                            | 2.35   |
| Quartz <sup>4</sup>       | 4.9134 | 4.9353                                     | 0.45   | 4.9134   | 4.9353                           | 0.45   | 5.4052   | 5.4451                            | 0.74   |
| Stishovite <sup>5</sup>   | 4.1812 | 4.1725                                     | 0.21   | 4.1812   | 4.1725                           | 0.21   | 2.6662   | 2.6649                            | 0.05   |
| Coesite <sup>6</sup>      | 7.1400 | 7.0843                                     | 0.78   | 12.3710  | 12.4097                          | 0.31   | 7.1750   | 7.2199                            | 0.63   |
| Cristobalite <sup>7</sup> | 4.9717 | 4.9438                                     | 0.56   | 4.9717   | 4.9438                           | 0.56   | 6.9223   | 6.7058                            | 3.13   |
| Gibbsite <sup>8</sup>     | 8.7420 | 8.9410                                     | 2.28   | 5.1120   | 5.1091                           | 0.06   | 9.8010   | 9.9486                            | 1.51   |
| Corundum <sup>9</sup>     | 4.7589 | 4.7681                                     | 0.19   | 4.7589   | 4.7681                           | 0.19   | 12.9912  | 13.1647                           | 1.34   |
|                           |        | $\alpha$ (°)                               |        |          | $\beta$ (°)                      |        |          | $\gamma$ (°)                      |        |
| Kyanite                   | 90.02  | 89.98                                      | 0.05   | 101.02   | 101.03                           | 0.01   | 106.06   | 105.99                            | 0.07   |
| Andalusite                | 90.00  | 90.00                                      | 0.00   | 90.00    | 90.00                            | 0.00   | 90.00    | 90.00                             | 0.00   |
| Sillimanite               | 90.00  | 90.00                                      | 0.00   | 90.00    | 90.00                            | 0.00   | 90.00    | 90.00                             | 0.00   |
| Quartz                    | 90.00  | 90.00                                      | 0.00   | 90.00    | 90.00                            | 0.00   | 120.00   | 120.00                            | 0.00   |
| Stishovite                | 90.00  | 90.00                                      | 0.00   | 90.00    | 90.00                            | 0.00   | 90.00    | 90.00                             | 0.00   |
| Coesite                   | 90.00  | 90.00                                      | 0.00   | 120.34   | 120.39                           | 0.04   | 90.00    | 89.99                             | 0.01   |
| Cristobalite              | 90.00  | 90.00                                      | 0.00   | 90.00    | 90.00                            | 0.00   | 90.00    | 90.00                             | 0.00   |
| Gibbsite                  | 90.00  | 90.00                                      | 0.00   | 94.54    | 90.01                            | 4.80   | 90.00    | 90.00                             | 0.00   |
| Corundum                  | 90.00  | 90.00                                      | 0.00   | 90.00    | 90.00                            | 0.00   | 120.00   | 120.00                            | 0.00   |
|                           |        | Density (g/cm <sup>3</sup> ) <sup>10</sup> |        |          | Bulk Modulus (GPa) <sup>10</sup> |        |          | Shear Modulus (GPa) <sup>10</sup> |        |
| Kyanite                   | 3.6640 | 3.6298                                     | 0.93   | -        | 202.2200                         | -      | -        | 105.1070                          | -      |
| Andalusite                | 3.1500 | 3.1259                                     | 0.77   | 162.0000 | 158.6768                         | 2.05   | 99.1000  | 91.8329                           | 7.33   |
| Sillimanite               | 3.2410 | 3.2603                                     | 0.60   | 170.8000 | 181.4548                         | 6.24   | 91.5000  | 92.3348                           | 0.91   |
| Quartz                    | 2.6500 | 2.6062                                     | 1.65   | 36.4000  | 35.1301                          | 3.49   | -        | 38.4159                           | -      |
| Stishovite                | 4.2900 | 4.3015                                     | 0.27   | 316.0000 | 345.4134                         | 9.31   | 220.0000 | 207.0695                          | 5.88   |
| Coesite                   | 2.9200 | 2.9160                                     | 0.14   | 113.7000 | 129.0052                         | 13.46  | 61.6000  | 55.7952                           | 9.42   |
| Cristobalite              | 2.3350 | 2.4352                                     | 4.29   | 16.4000  | 12.5689                          | 23.36  | 39.1000  | 38.9393                           | 0.41   |
| Gibbsite                  | 2.4210 | 2.2756                                     | 6.01   | -        | 58.2094                          | -      | -        | 29.0147                           | -      |
| Corundum                  | 3.9800 | 3.9193                                     | 1.53   | 253.3000 | 268.6118                         | 6.04   | 163.2000 | 135.8447                          | 16.76  |

Table 2: Potential model cut-off tests. Some of the structures specified above were optimised with different maximum cut-off values. A successful result indicates the structure was optimised with no instability in the final structure and reproduced the structural properties within reasonable limits.

| Structure   | Formula                                                        | Cut-off values tested (Å) |             |             |      |
|-------------|----------------------------------------------------------------|---------------------------|-------------|-------------|------|
|             |                                                                | 10                        | 12          | 14          | 15   |
| Kaolinite   | Al <sub>4</sub> Si <sub>4</sub> O <sub>18</sub> H <sub>8</sub> | <b>Fail</b>               | <b>Fail</b> | Pass        | Pass |
| Andalusite  | Al <sub>2</sub> SiO <sub>5</sub>                               | <b>Fail</b>               | <b>Fail</b> | <b>Fail</b> | Pass |
| Kyanite     | Al <sub>2</sub> SiO <sub>5</sub>                               | <b>Fail</b>               | Pass        | <b>Fail</b> | Pass |
| Sillimanite | Al <sub>2</sub> SiO <sub>5</sub>                               | Pass                      | Pass        | Pass        | Pass |
| Quartz      | SiO <sub>2</sub>                                               | <b>Fail</b>               | Pass        | Pass        | Pass |
| Stishovite  | SiO <sub>2</sub>                                               | Pass                      | Pass        | <b>Fail</b> | Pass |
| Coesite     | SiO <sub>2</sub>                                               | <b>Fail</b>               | Pass        | <b>Fail</b> | Pass |
| Gibbsite    | AlOH                                                           | Pass                      | <b>Fail</b> | Pass        | Pass |
| Corundum    | AlO <sub>3</sub>                                               | Pass                      | Pass        | <b>Fail</b> | Pass |

## References

- J.D. Gale and A.L. Rohl, *Mol. Simul.*, 2003, **29**, 291-341.
- J. B. Burt, N. L. Ross, R. J. Angel and M. Koch, *Amer. Miner.*, 2006, **91**, 319-326.
- M. W. Schmidt, S. Poli, P. Comodi and P. F. Zanazzi, *Amer. Miner.*, 1997, **82**, 460-466.
- S. M. Antao, I. Hassan, J. Wang, P. L. Lee and B. H. Toby, *Amer. Miner.*, 2008, **46**, 1501-1509.
- T. Yamanaka, T. Fukuda and J. Mimaki, *Phys. Chem. Miner.*, 2002, **29**, 633-641.
- D. Ikuta, N. Kawame, S. Banno, T. Hirajima, K. Ito, J. F. Rakovan, R. T. Downs and O. Tamada, *Amer. Miner.*, 2007, **92**, 57-63.
- R. T. Downs and D. C. Palmer, *Amer. Miner.*, 1996, **79**, 9-14.
- E. Balan, M. Lazzeri, G. Morin and F. Mauri, *Amer. Miner.*, 2006, **91**, 115-119.
- A. Kirfel and K. Eichhorn, *Acta. Cryst. A*, 1990, **46**, 271-284.
- T. J. Ahrens, *Mineral Physics and Crystallography: A Handbook of Physical Constants*, American Geophysical Union: Washington, DC, 1995.
